## Usefulness of collaboration between mathematical models and cell engineering for elucidating complex disease mechanisms and discover effective drugs

H. Kohjitani<sup>1</sup>, A. Kashiwa<sup>2</sup>, T. Makiyama<sup>1</sup>, F. Toyoda<sup>3</sup>, Y. Yamamoto<sup>1</sup>, Y. Wuriyanghai<sup>1</sup>, S. Ohno<sup>4</sup>, T. Aizawa<sup>2</sup>, T. Imamura<sup>2</sup>, S. Shizuta<sup>1</sup>, T. Kimura<sup>1</sup>

<sup>1</sup>Kyoto University Hospital, Kyoto, Japan; <sup>2</sup>Kyoto University Graduate School of Medicine, Department of Cardiovascular Medicine, Kyoto, Japan; <sup>3</sup>Shiga University of Medical Science, Department of Physiology, Otsu, Japan; <sup>4</sup>National Cerebral and Cardiovascular Center Hospital, Department of Bioscience and Genetics, Osaka, Japan

**Funding Acknowledgement:** Type of funding source: Public Institution(s). Main funding source(s): Japan Society for the Promotion of Science, Grant-in-Aid for Young Scientists

**Background:** A missense mutation, CACNA1C-E1115K, located in the cardiac L-type calcium channel (LTCC), was recently reported to be associated with diverse arrhythmias. Several studies reported in-vivo and in-vitro modeling of this mutation, but actual mechanism and target drug of this disease has not been clarified due to its complex ion-mechanisms.

**Objective:** To reveal the mechanism of this diverse arrhythmogenic phenotype using combination of in-vitro and in-silico model.

**Methods and results:** Cell-Engineering Phase: We generated human induced pluripotent stem cell (hiPSC) from a patient carrying heterozygous CACNA1C-E1115K and differentiated into cardiomyocytes. Spontaneous APs were recorded from spontaneously beating single cardiomyocytes by using the perforated patch-clamp technique.

**Mathematical-Modeling Phase:** We newly developed ICaL-mutation mathematical model, fitted into experimental data, including its impaired ion selectivity. Furthermore, we installed this mathematical model into hiPSC-CM simulation model.

**Collaboration Phase:** Mutant in-silico model showed APD prolongation and frequent early afterdepolarization (EAD), which are same as in-vitro model. In-silico model revealed this EAD was mostly related to robust late-mode of sodium current occurred by Na<sup>+</sup> overload and suggested that mexiletine is capable of reducing arrhythmia. Afterward, we applied mexiletine onto hiPSC-CMs mutant model and found mexiletine suppress EADs.

**Conclusions:** Precise in-silico disease model can elucidate complicated ion currents and contribute predicting result of drug-testing.

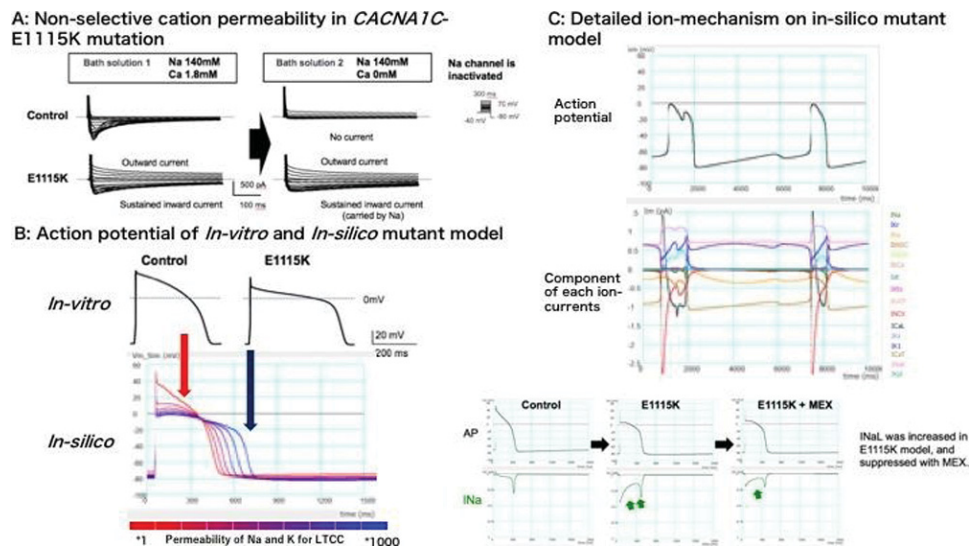

Source: http://academic.oup.com/eurheartj/article-pdf/41/Supplement_2/ehaa946.3600/34516495/ehaa946.3600.pdf
